# Supplementary material for: Synthesis and biological evaluation of 3-amino-3-hydroxymethyloxindoles as potential anti-cancer agents
Source: Royal Society of Chemistry journal article supplement (doi:10.1039/c6ra27536b), 2017-01-01

## **Synthesis and Biological Evaluation of 3-Amino-3-hydroxymethyloxindoles as Potential Anti-cancer Agents**

Kaili Jia,<sup>a</sup> Xinxin Lv,<sup>a</sup> Dong Xing, Jiuwei Che, Donglan Liu, Nilesh J. Thumar, Suzhen Dong\*, Wenhao Hu\*

Shanghai Engineering Research Center of Molecular Therapeutics and New Drug Development, School of Chemistry and Molecular Engineering, East China Normal University, 3663 North Zhongshan Rd., Shanghai 200062, China.

† <sup>a</sup>These authors contribute to this paper equally.

HPLC condition:

ACQUITY UPLC<sup>®</sup> BEH C18 column,  
MeCN/H<sub>2</sub>O = 5%\_95%\_4min\_common;

flow rate = 0.6 mL / min;

[Gradient Table]

|  | Time(min) | Flow Rate(mL/min) | %A | %B | %C | %D | Curve |
|--|-----------|-------------------|----|----|----|----|-------|
|--|-----------|-------------------|----|----|----|----|-------|

|    |         |       |      |     |     |     |         |
|----|---------|-------|------|-----|-----|-----|---------|
| 1. | Initial | 0.600 | 95.0 | 5.0 | 0.0 | 0.0 | Initial |
|----|---------|-------|------|-----|-----|-----|---------|

|    |      |       |      |      |     |     |   |
|----|------|-------|------|------|-----|-----|---|
| 2. | 2.80 | 0.600 | 10.0 | 90.0 | 0.0 | 0.0 | 6 |
|----|------|-------|------|------|-----|-----|---|

|    |      |       |      |      |     |     |   |
|----|------|-------|------|------|-----|-----|---|
| 3. | 3.20 | 0.600 | 10.0 | 90.0 | 0.0 | 0.0 | 6 |
|----|------|-------|------|------|-----|-----|---|

|    |      |       |       |     |     |     |   |
|----|------|-------|-------|-----|-----|-----|---|
| 4. | 3.50 | 0.600 | 100.0 | 0.0 | 0.0 | 0.0 | 6 |
|----|------|-------|-------|-----|-----|-----|---|

|    |      |       |       |     |     |     |   |
|----|------|-------|-------|-----|-----|-----|---|
| 5. | 4.00 | 0.600 | 100.0 | 0.0 | 0.0 | 0.0 | 6 |
|----|------|-------|-------|-----|-----|-----|---|

Comment: A:H2O\_5%ACN    B:ACN t=0min,start 5%B,95%A

Flow Ramp Rate: 0.45 min

LXX01-040  
boss boss a

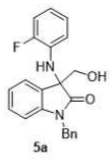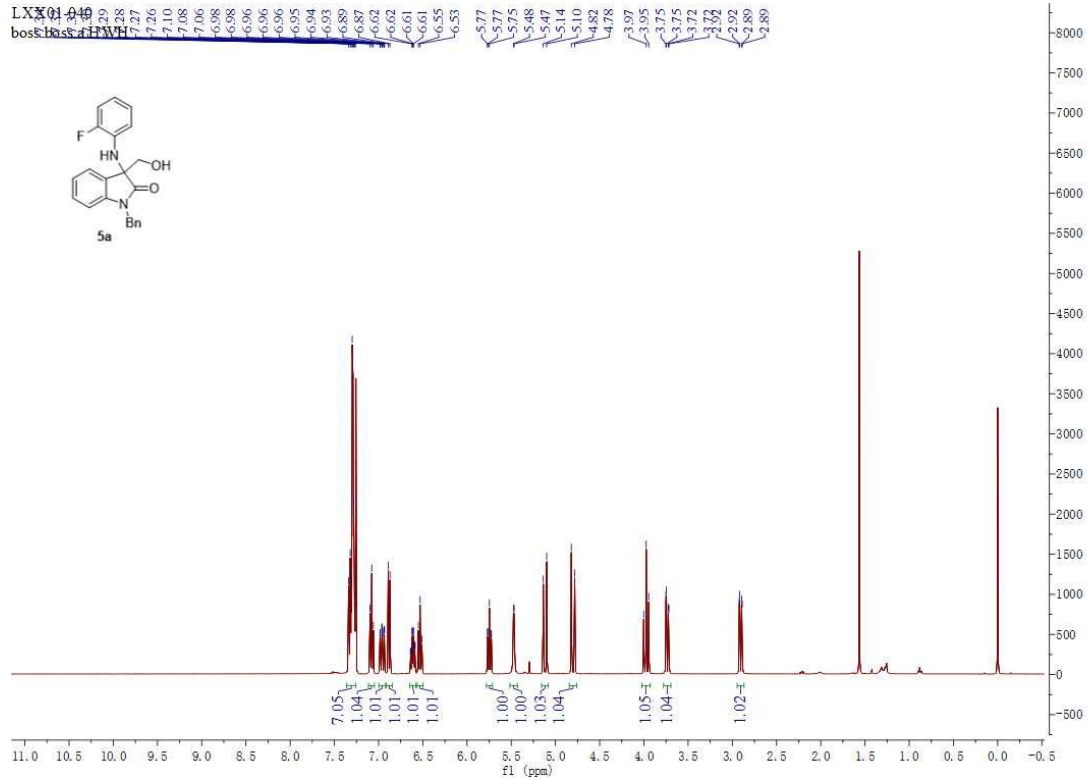

LXX01-040  
boss boss a

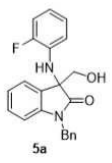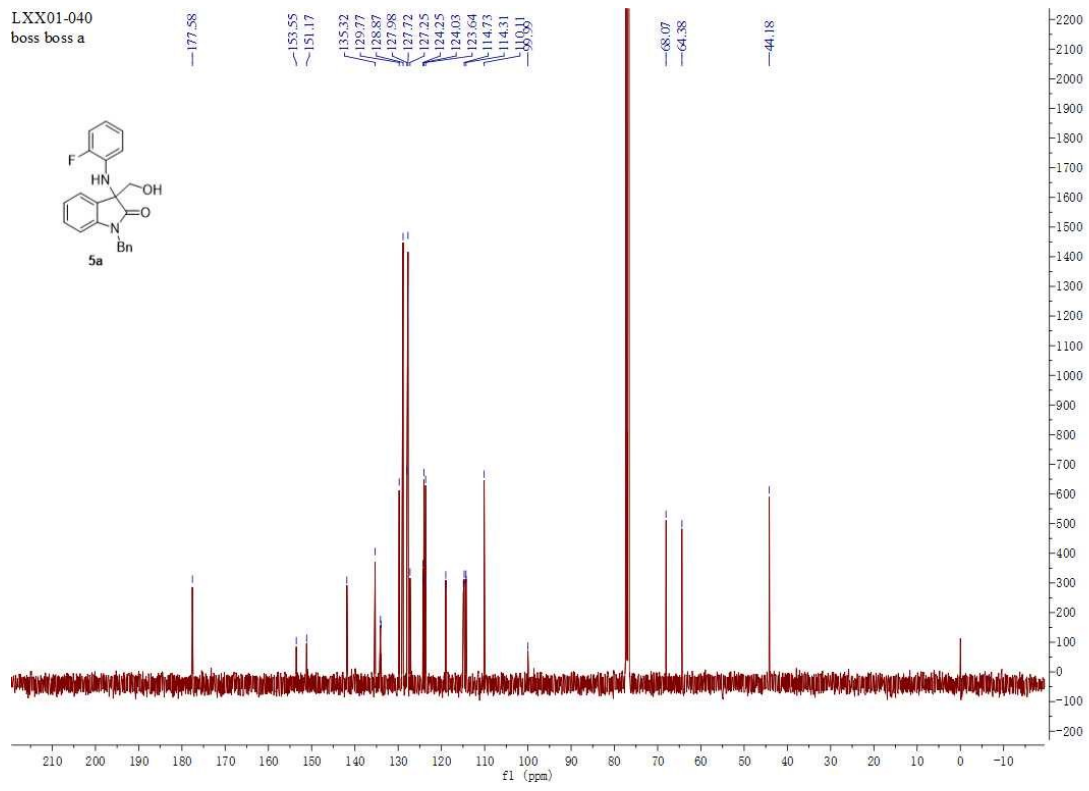

5a Sample Report:

Sample 35 Vial 1:9 ID File LXX01-040 Date 06-Jan-2016 Time 10:50:14 Description

3: UV Detector: 254

2.161  
Range: 2.167

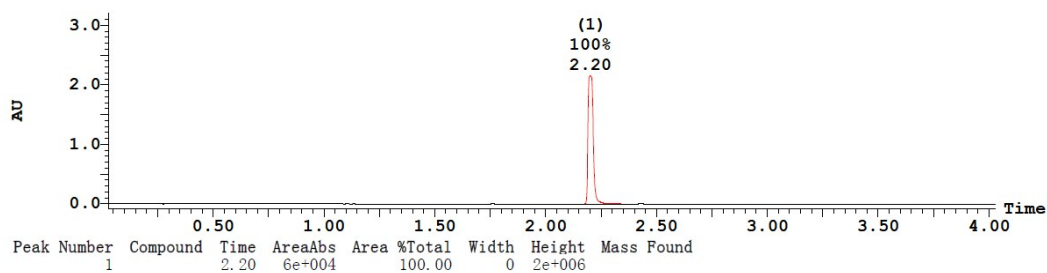

LXX01-34  
boss boss a HWH

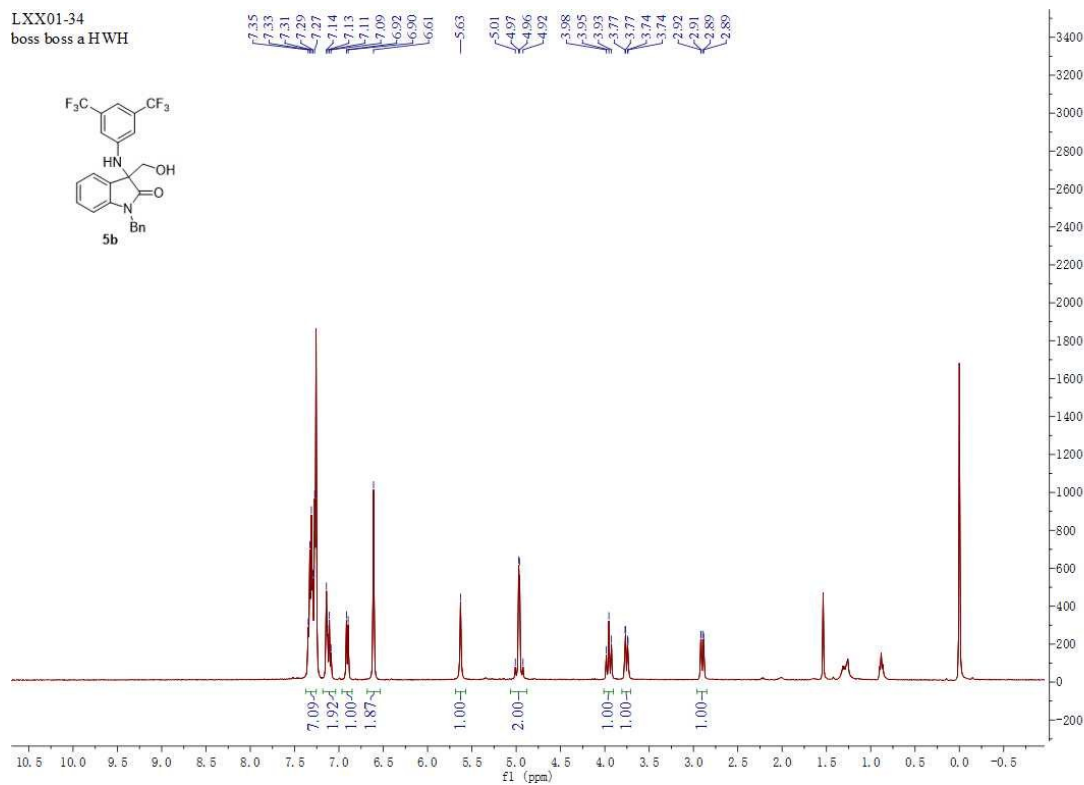

LXX01-34  
boss boss a HWH

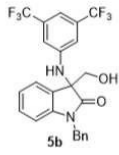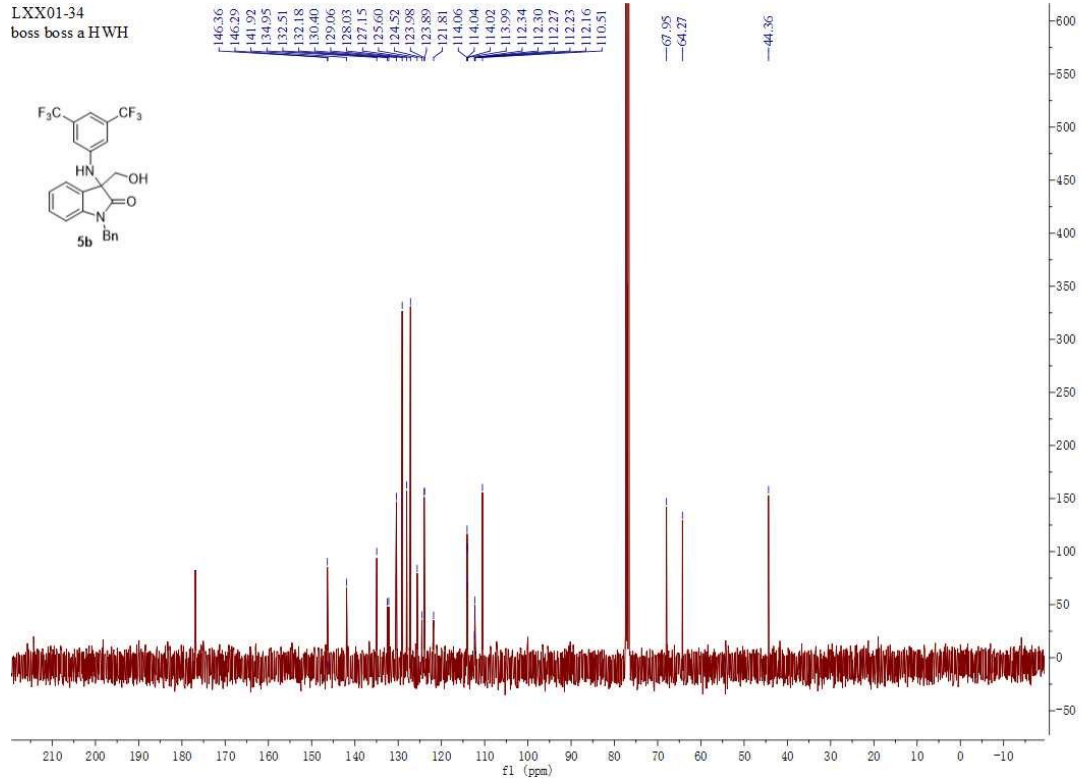

5b Sample Report:

Sample 33 Vial 1:7 ID File LXX01-034 Date 06-Jan-2016 Time 10:36:29 Description

3: UV Detector: 254

2.188  
Range: 2.194

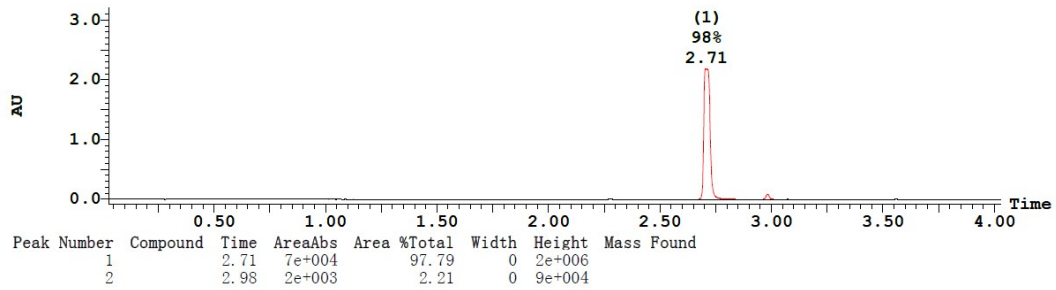

LXX01-005C  
boss boss a HWH

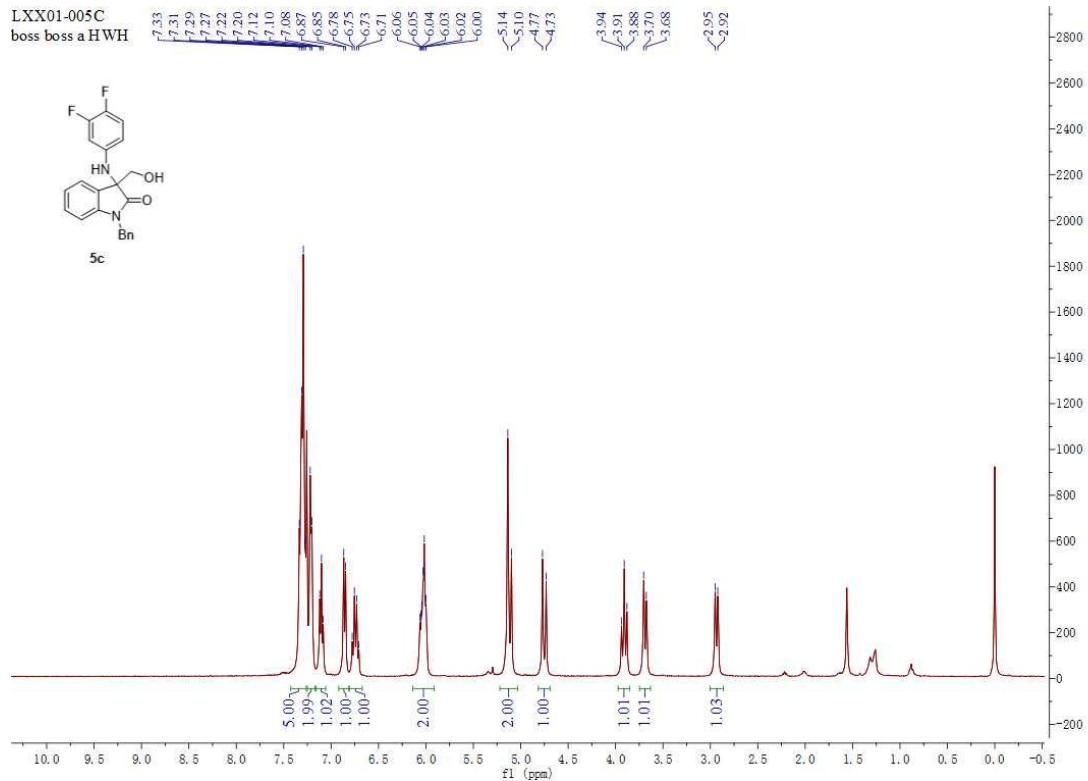

LXX01-005C  
boss boss a HWH

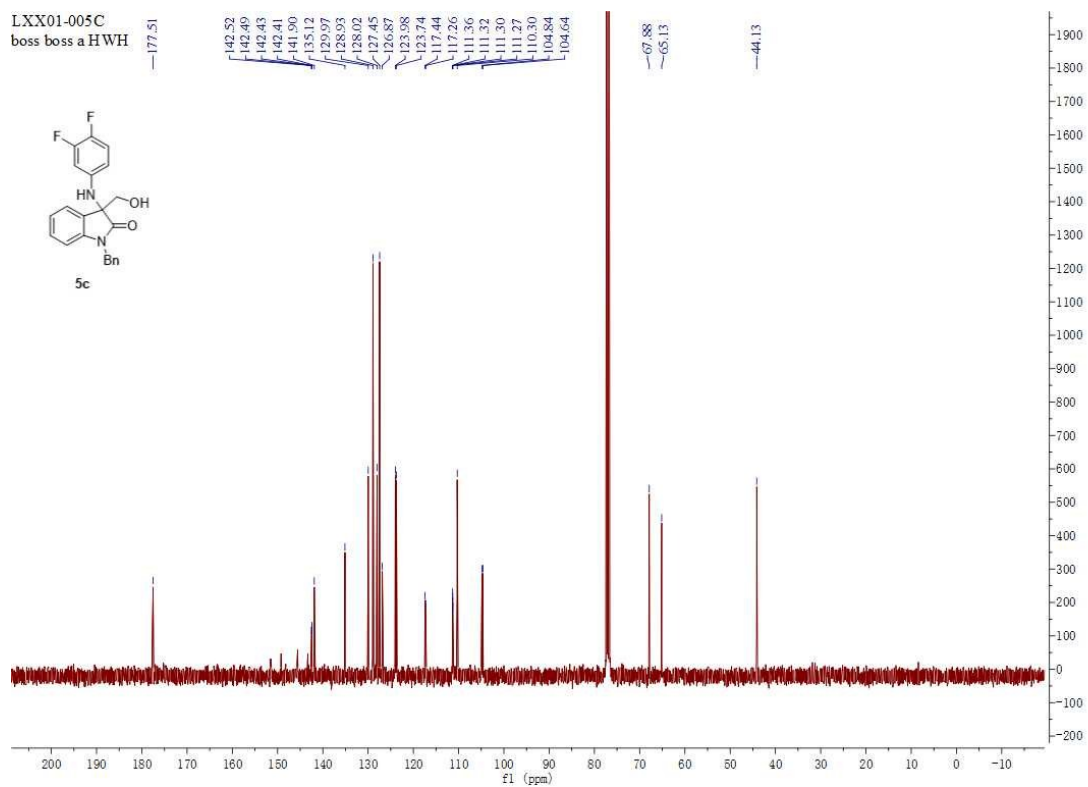

5c Sample Report:

Sample 23 Vial 1:1 ID File LXX01-005 Date 05-Jan-2016 Time 22:26:11 Description

3: UV Detector: 254

1.51  
Range: 1.515

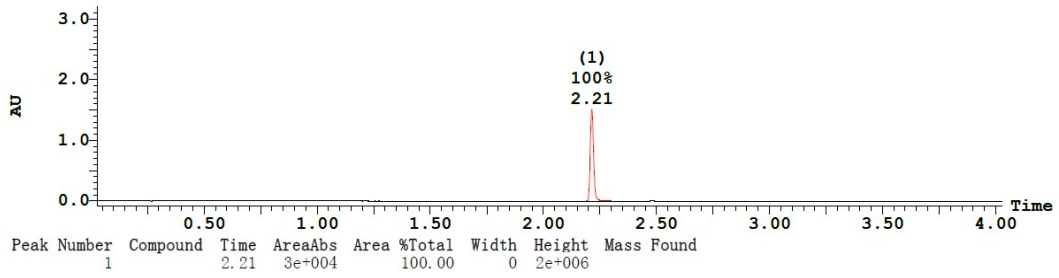

LXX01-027

boss boss a HWH

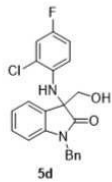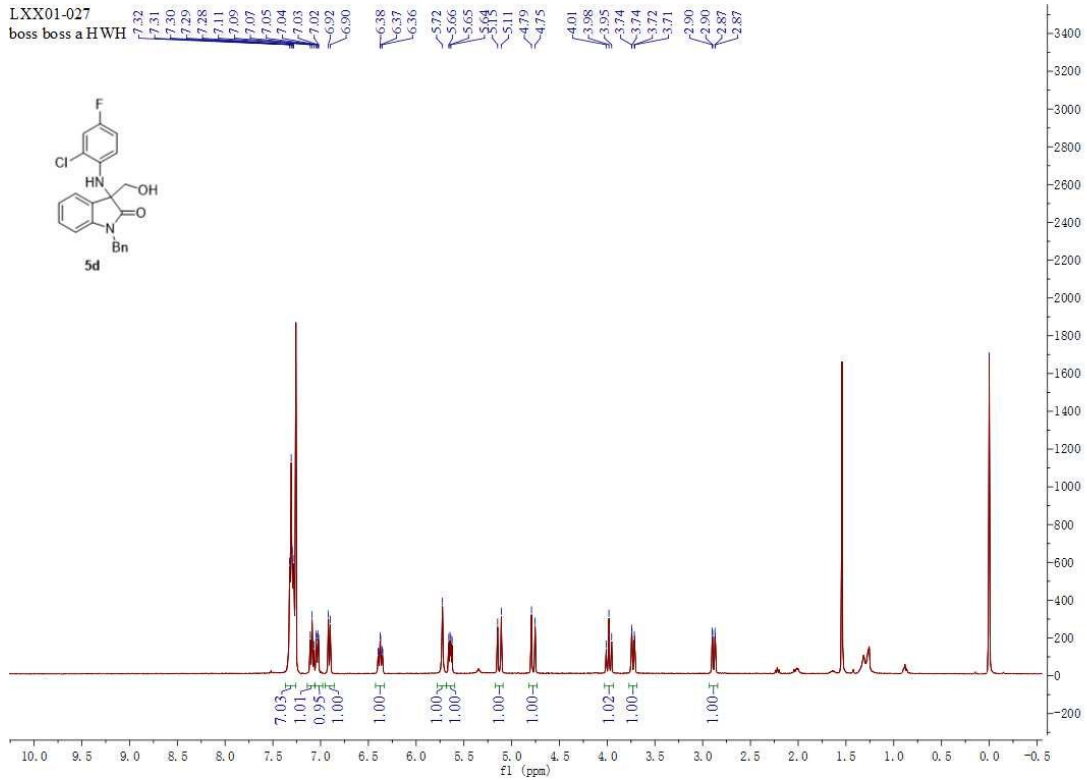

LXX01-027  
boss boss a HWH

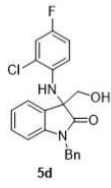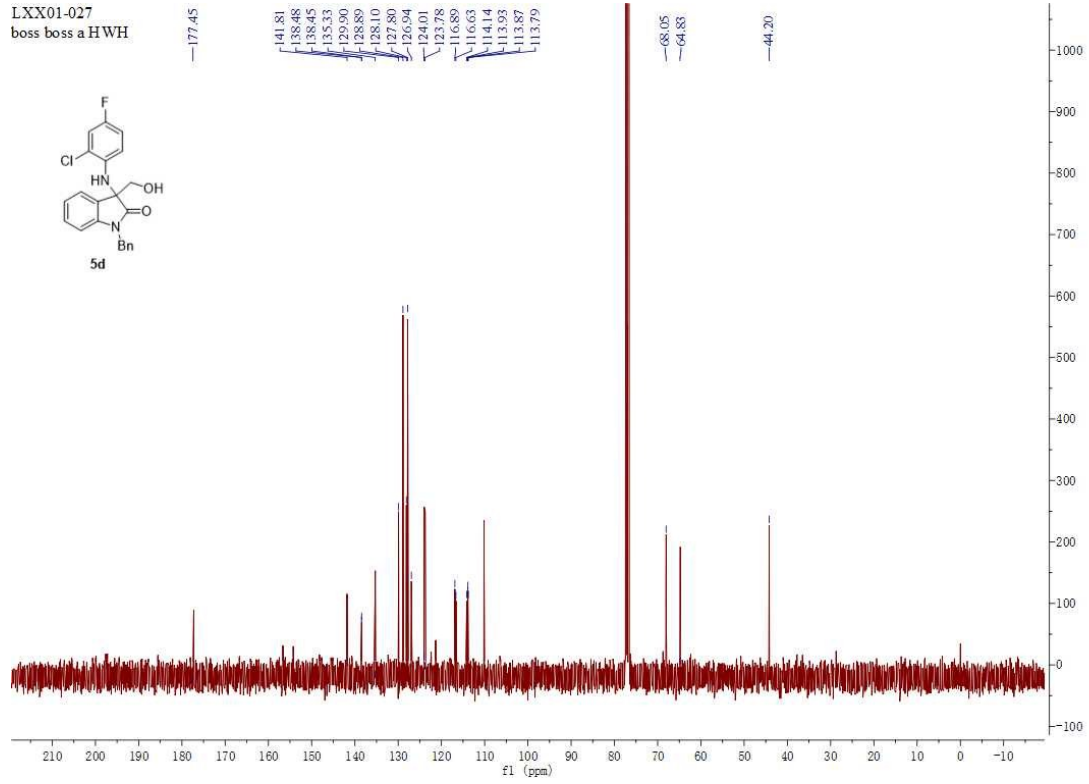

5d Sample Report:

Sample 29 Vial 1:3 ID File LXX01-027 Date 05-Jan-2016 Time 22:39:15 Description

3: UV Detector: 254

1.468  
Range: 1.473

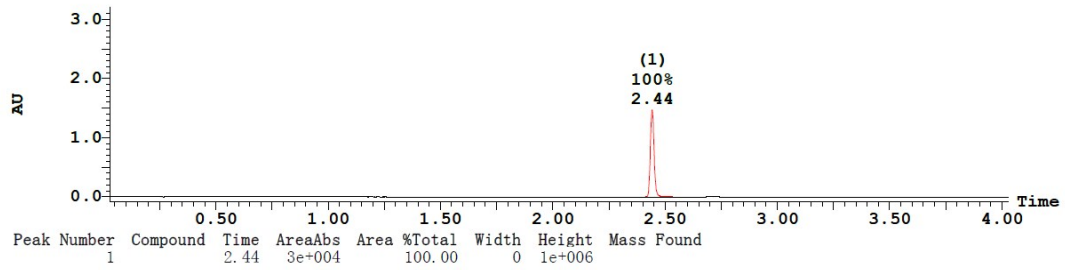



LXX01-029  
boss boss a HWH

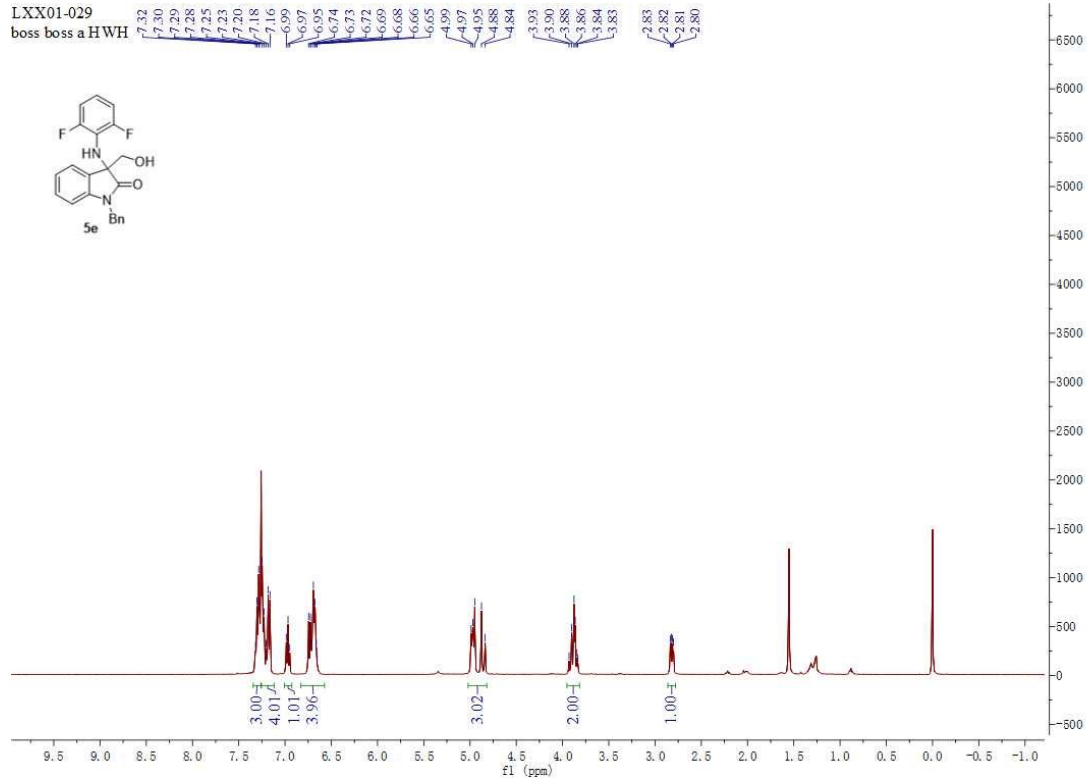

lxx01-29  
boss boss a HWH

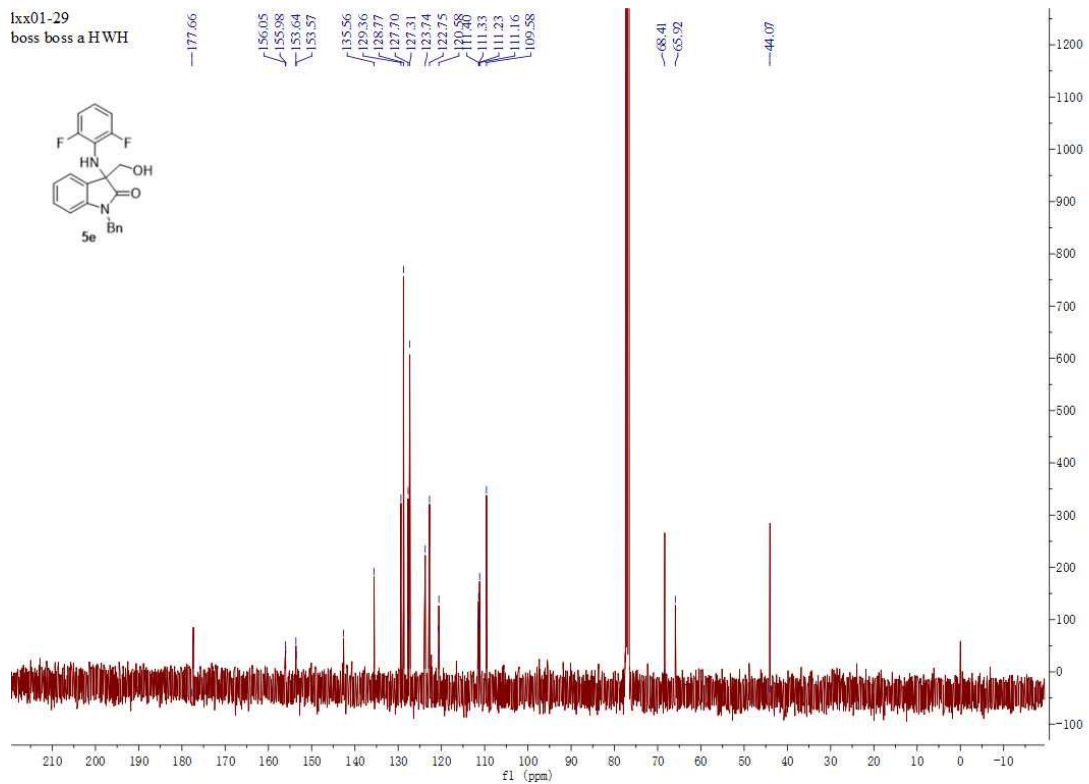

5e Sample Report:

Sample 31 Vial 1:5 ID File LXX01-029 Date 06-Jan-2016 Time 10:23:49 Description

3: UV Detector: 254

2.048  
Range: 2.053

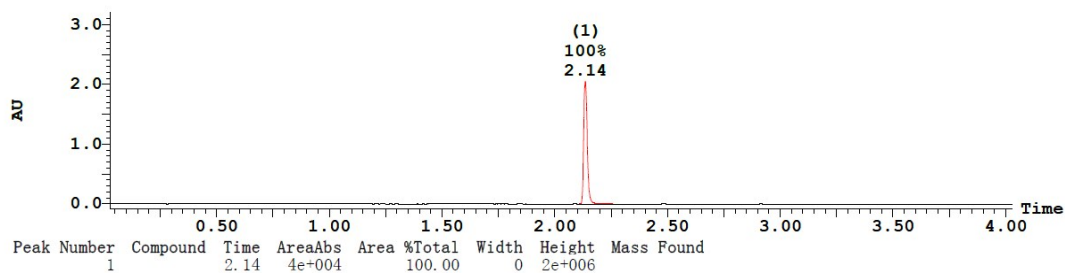

LXX01-032  
boss boss a HWH

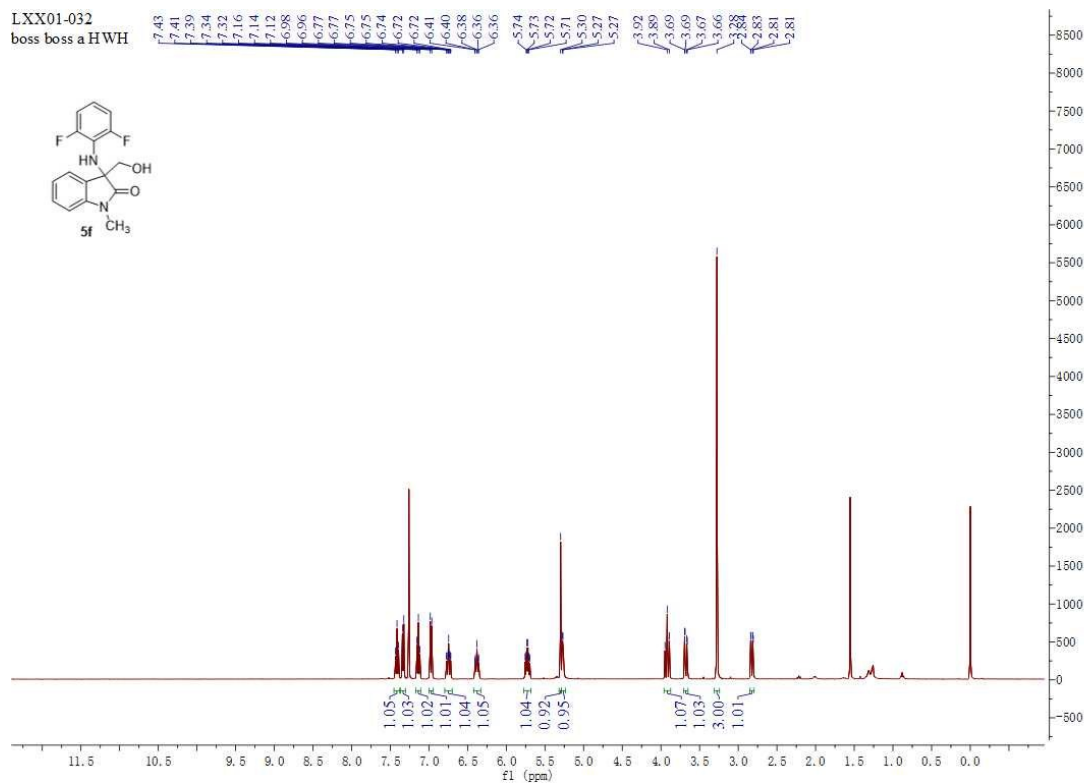

LXX06  
boss boss a HWH

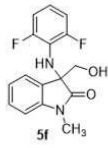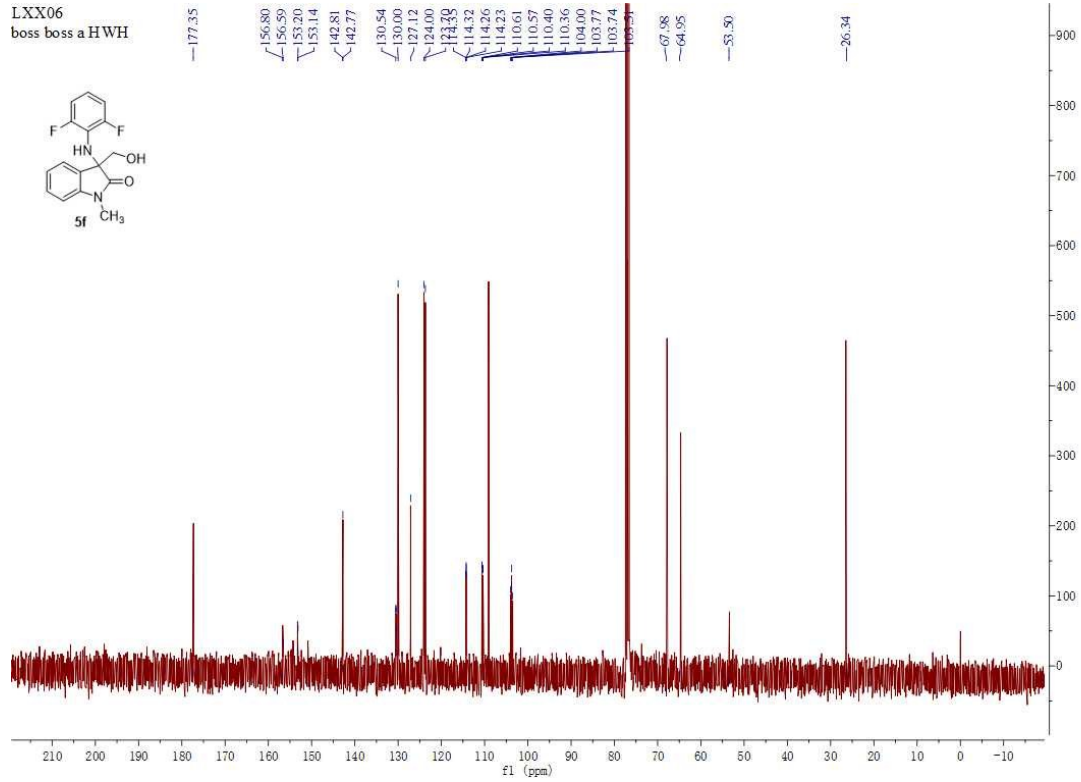

5f Sample Report:

Sample 32 Vial 1:6 ID File LXX01-032 Date 06-Jan-2016 Time 10:29:37 Description

3: UV Detector: 254

1.901  
Range: 1.907

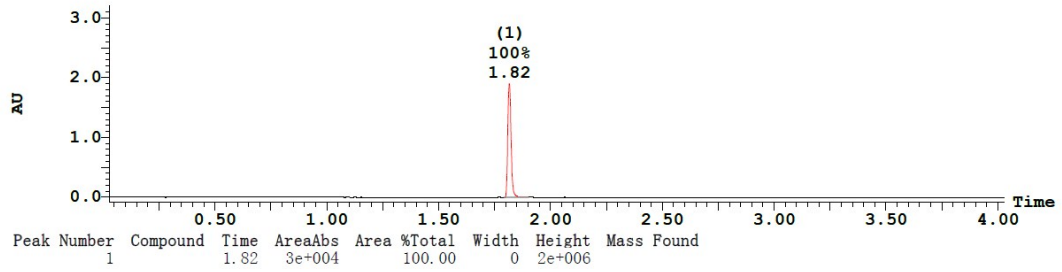

LXX01-045-2  
boss boss a HWH

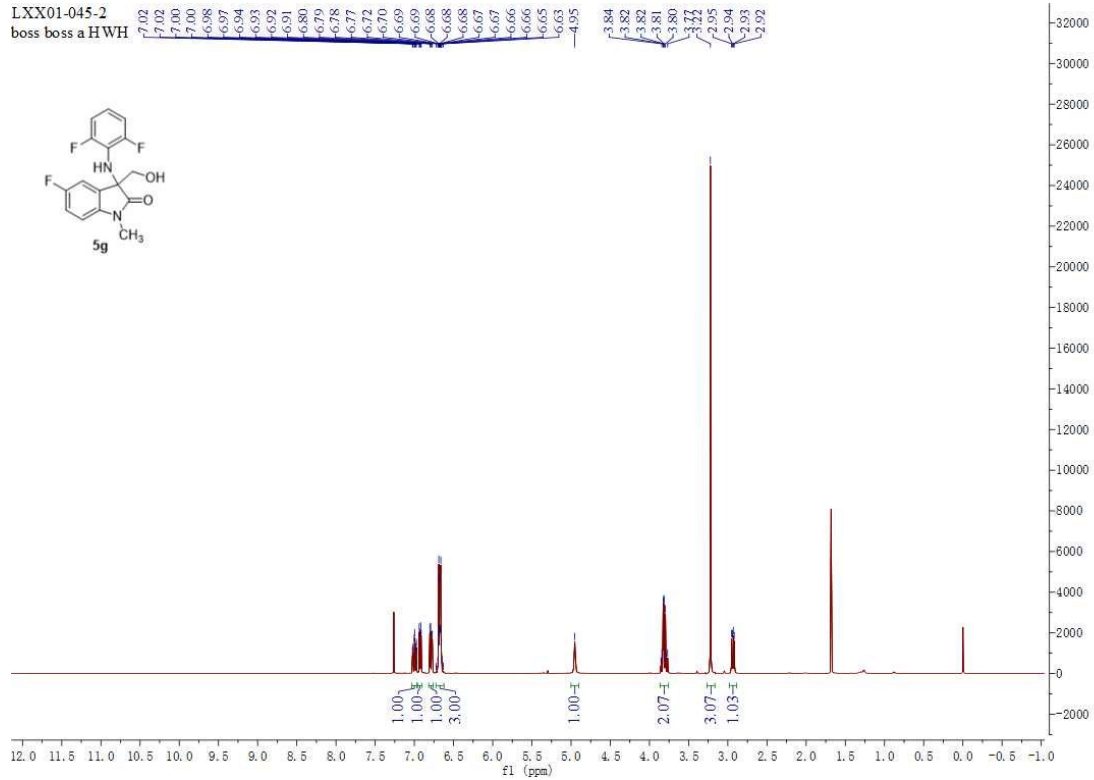

LXX01-045-2  
boss boss a HWH

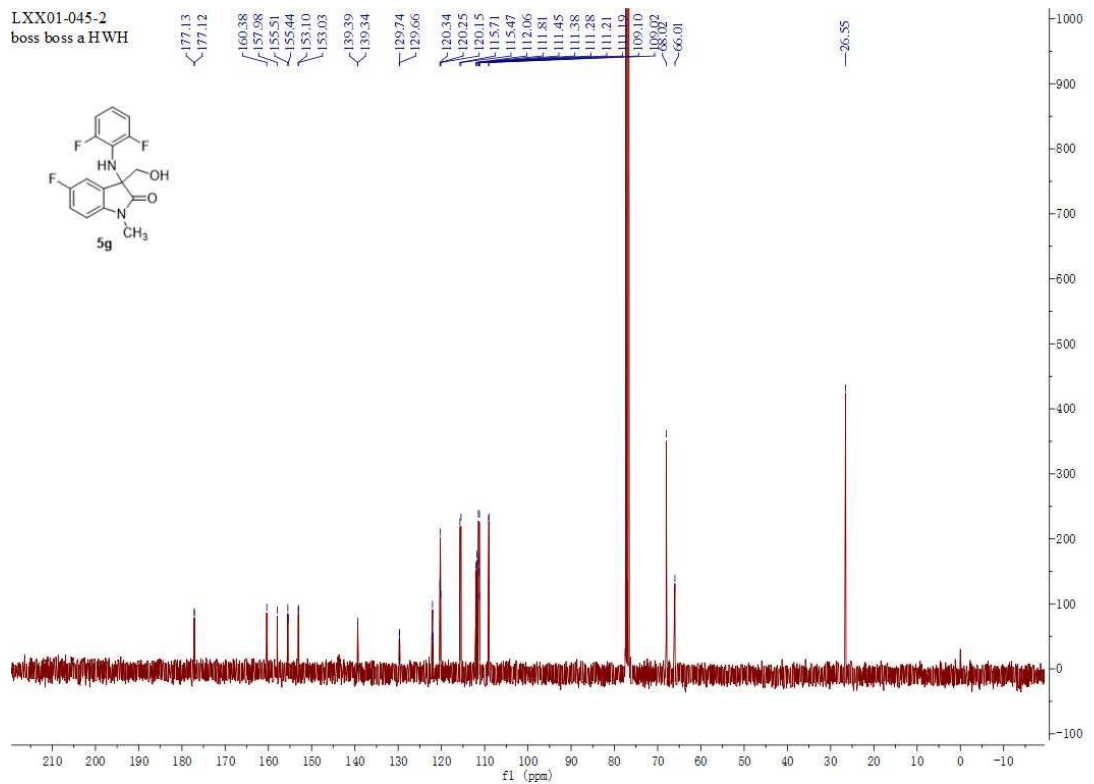

5g Sample Report:

Sample 24 Vial 1:10 ID File LXX01-045 Date 06-Jan-2016 Time 10:56:58 Description

3: UV Detector: 254

2.119  
Range: 2.125

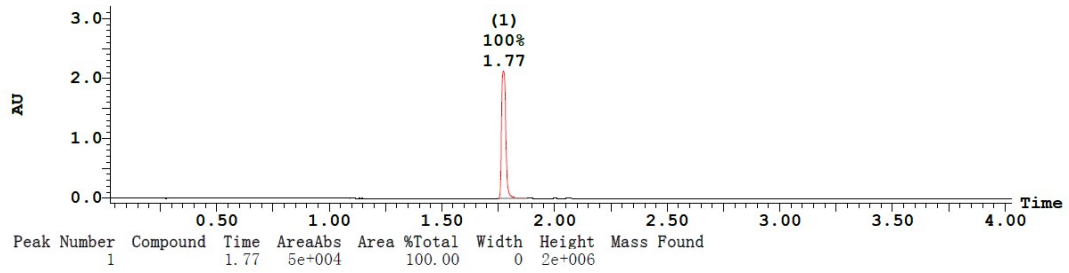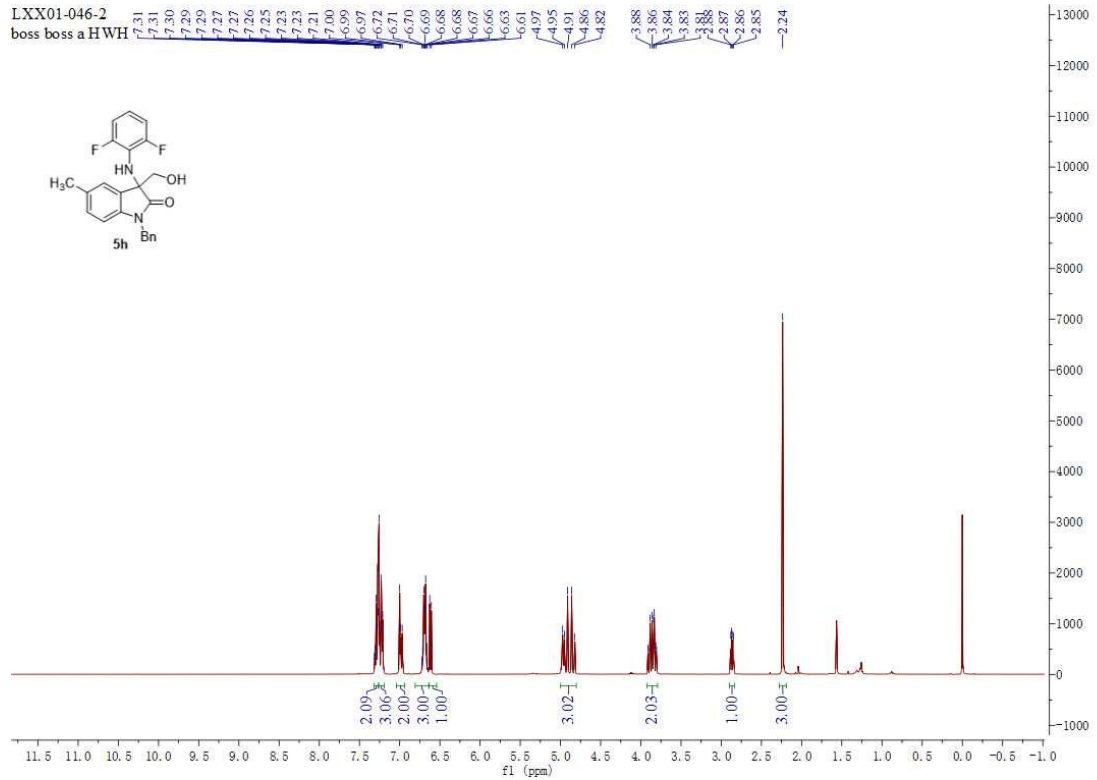

LXX01-046-2  
boss boss a HWH

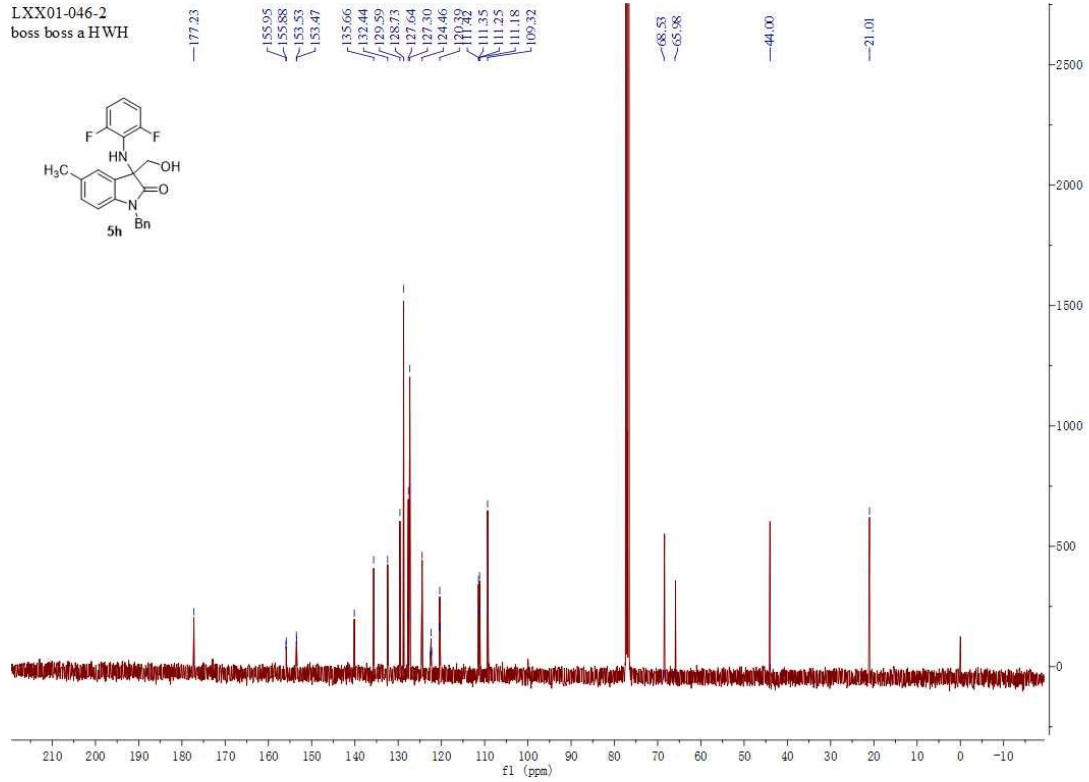

5h Sample Report:

Sample 25 Vial 1:11 ID File LXX01-046 Date 06-Jan-2016 Time 11:03:50 Description

3: UV Detector: 254

2.108

Range: 2.114

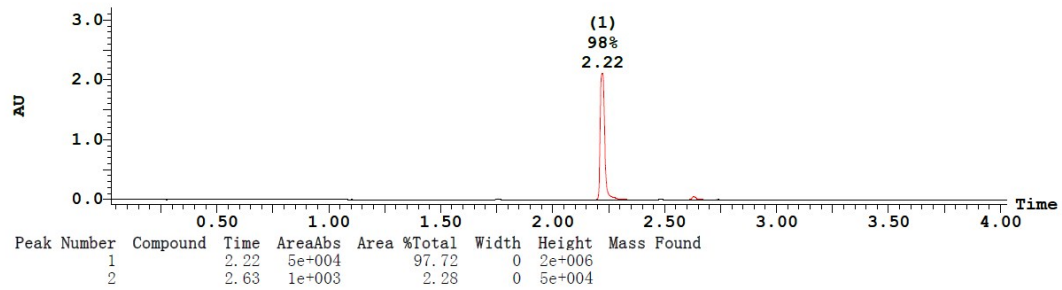

LXX01-38  
boss boss a HWH

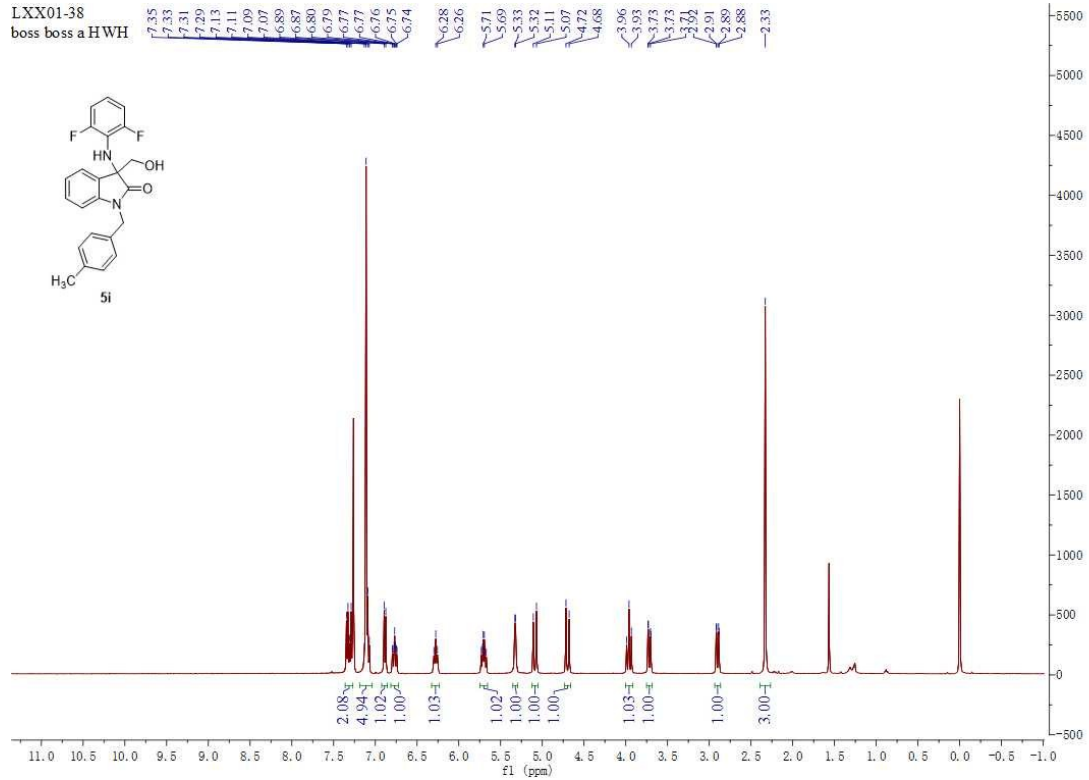

LXX01-38  
boss boss a HWH

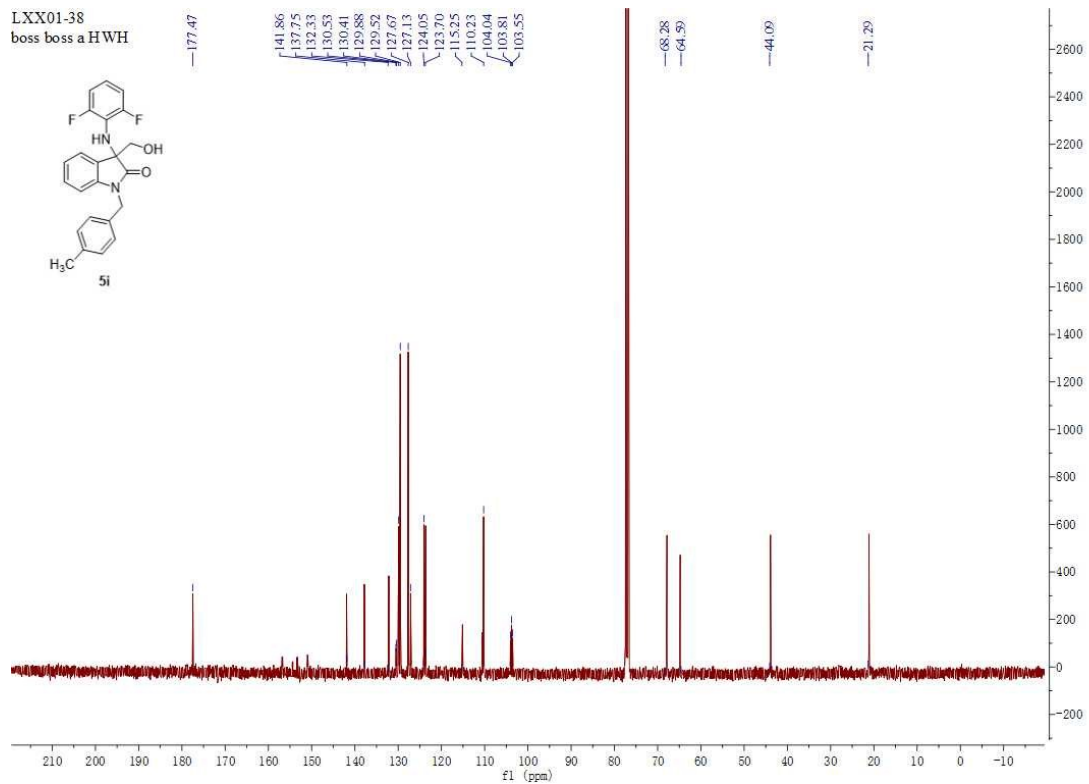

5i Sample Report:

Sample 34 Vial 1:8 ID File LXX01-038 Date 06-Jan-2016 Time 10:43:22 Description

3: UV Detector: 254

2.173  
Range: 2.18

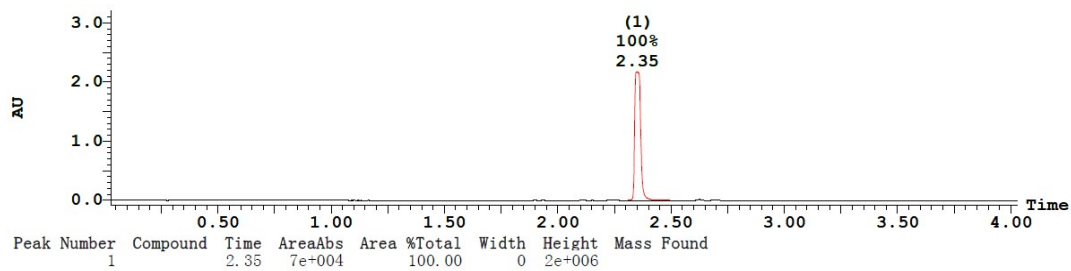

LXX01-049-3  
boss boss a HWH

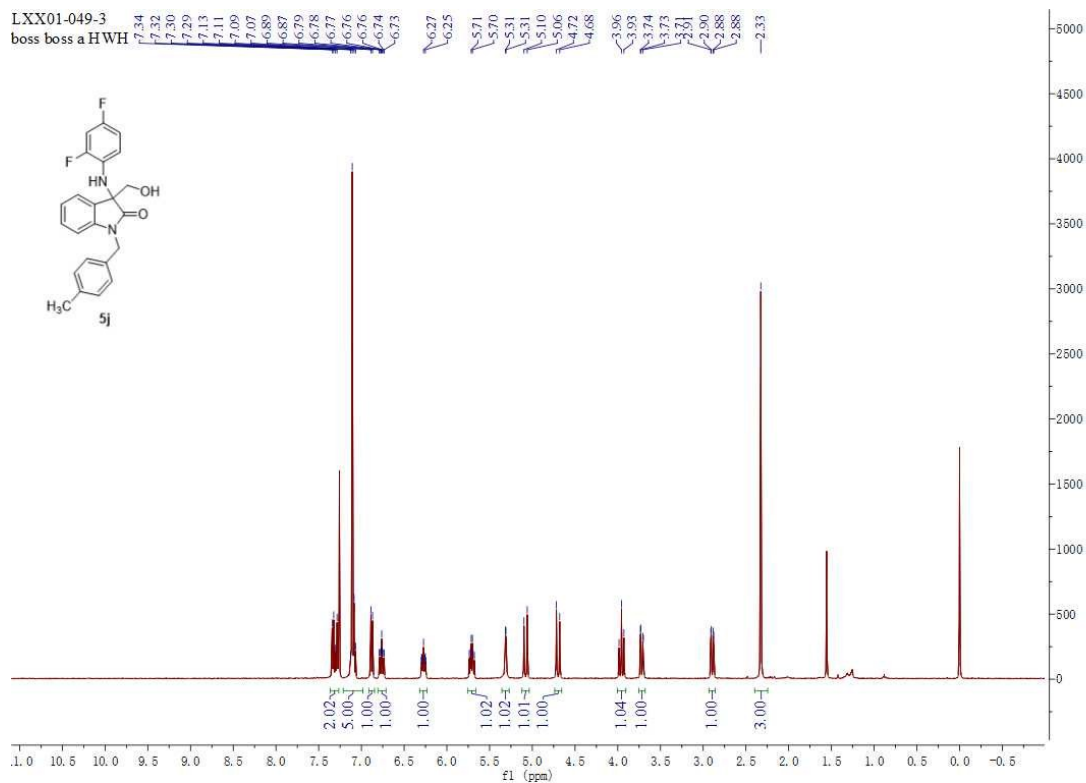



LXX01-049-3  
boss boss a HWH

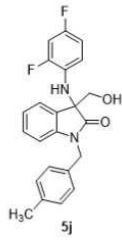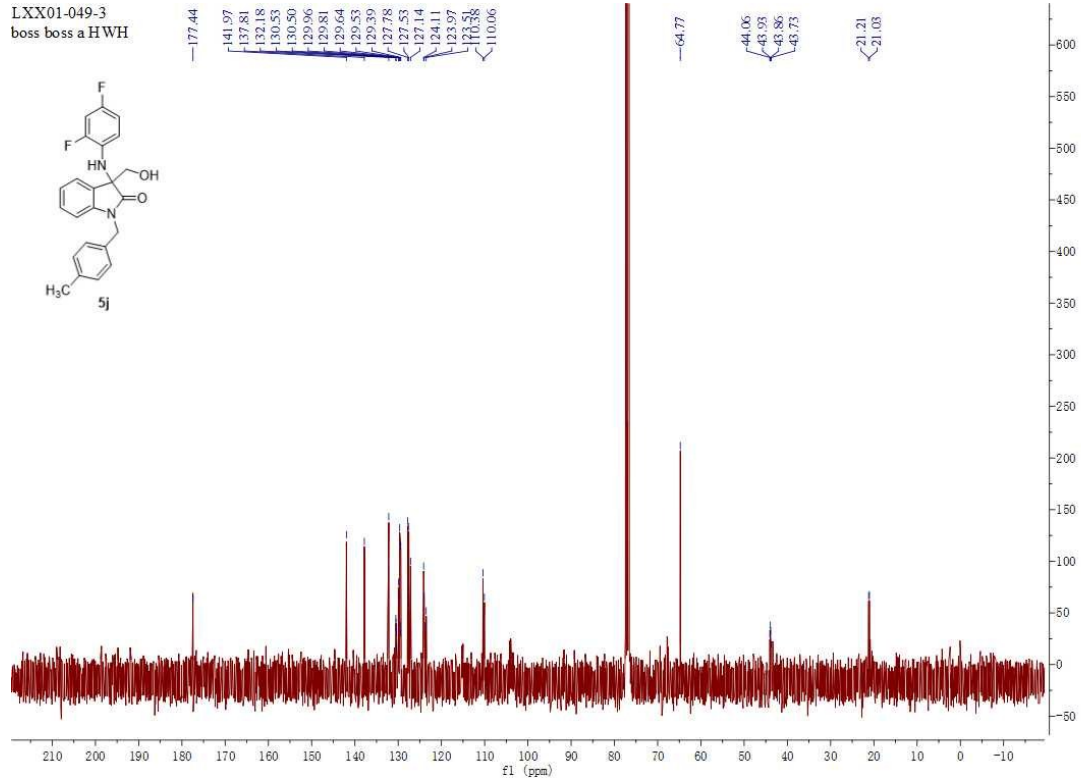

5j Sample Report:

Sample 22 Vial 1:13 ID File LXX01-049 Date 06-Jan-2016 Time 11:17:34 Description

3: UV Detector: 254

2.083  
Range: 2.089

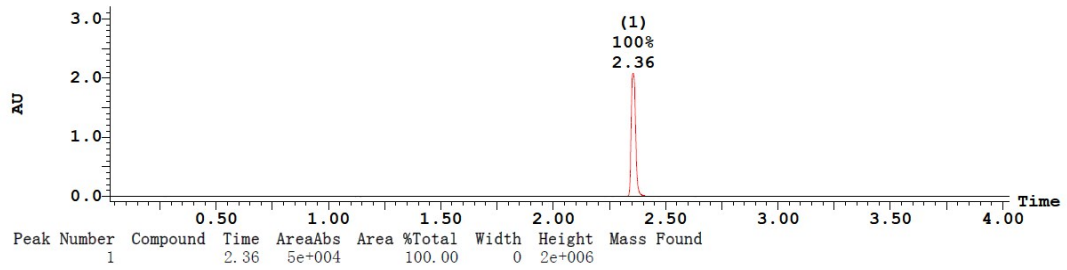

LXX01-026E  
boss boss a HWH

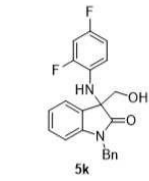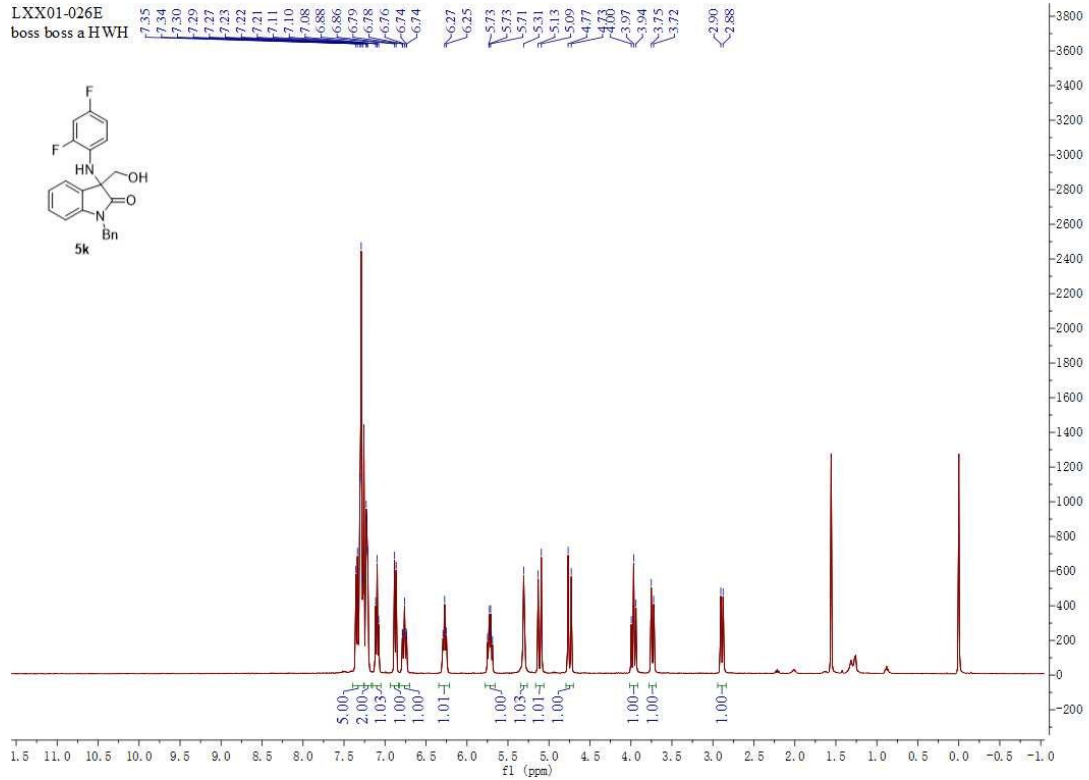

LXX01-026  
boss boss a HWH

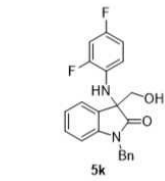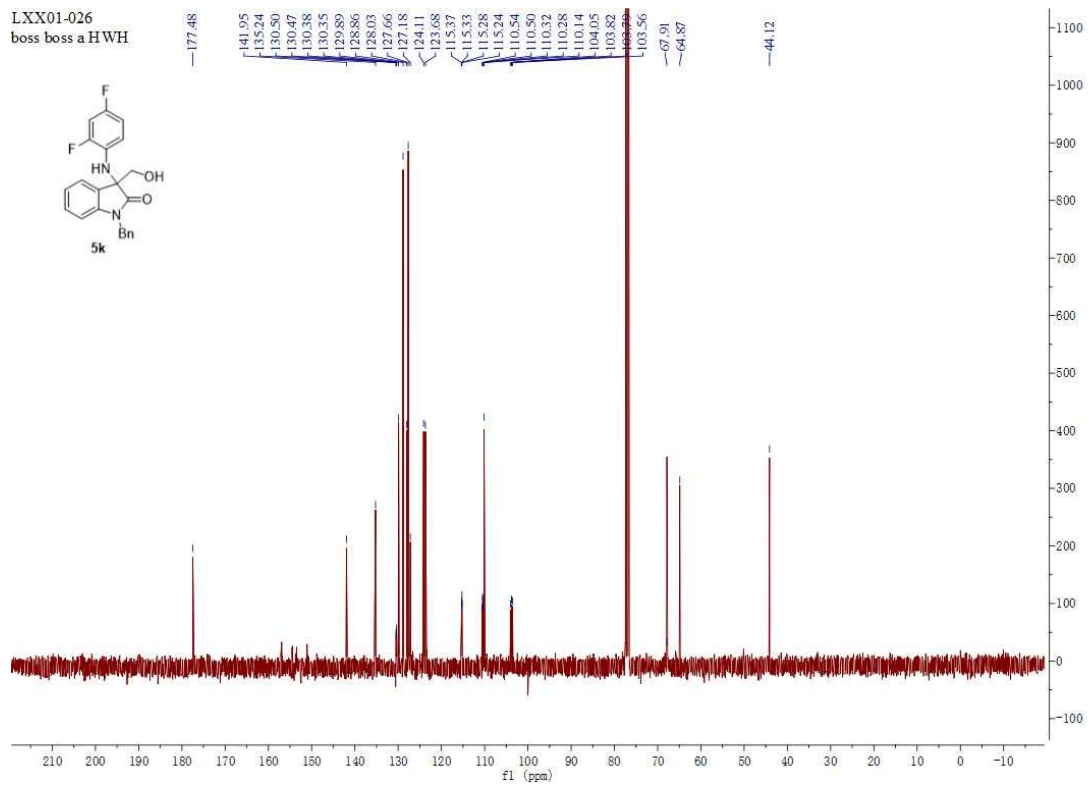

5k Sample Report:

Sample 28 Vial 1:2 ID File LXX01-026 Date 05-Jan-2016 Time 22:32:26 Description

3: UV Detector: 254

2.135  
Range: 2.14

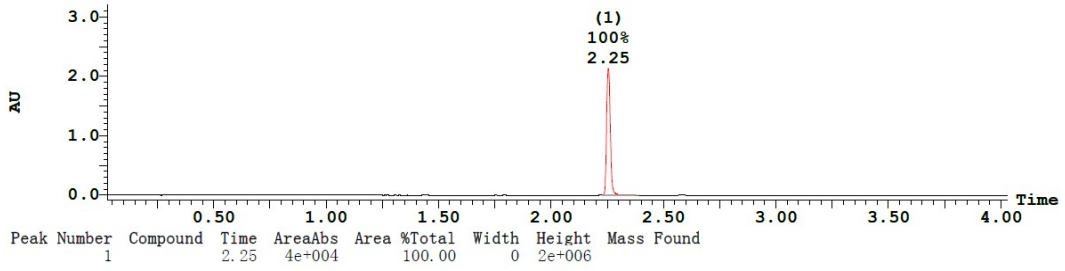

LXX01-051

boss boss a HWH

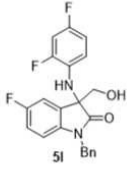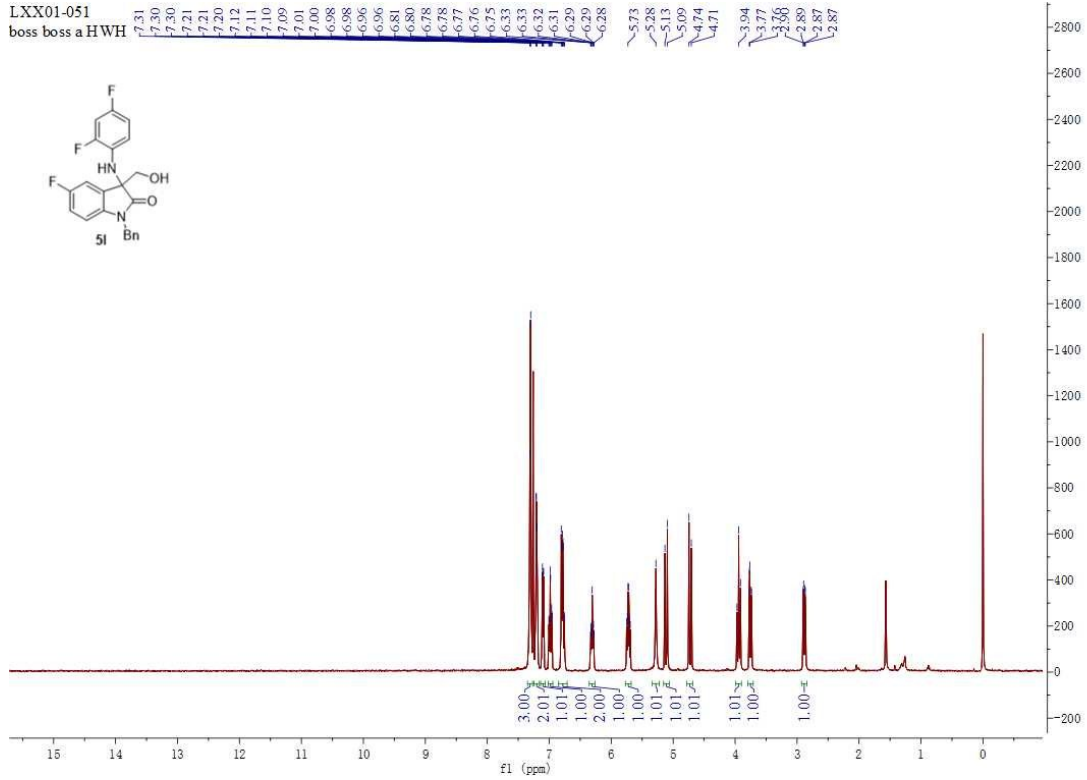

LXX01-051  
boss boss a HWH

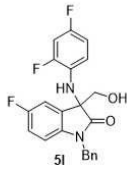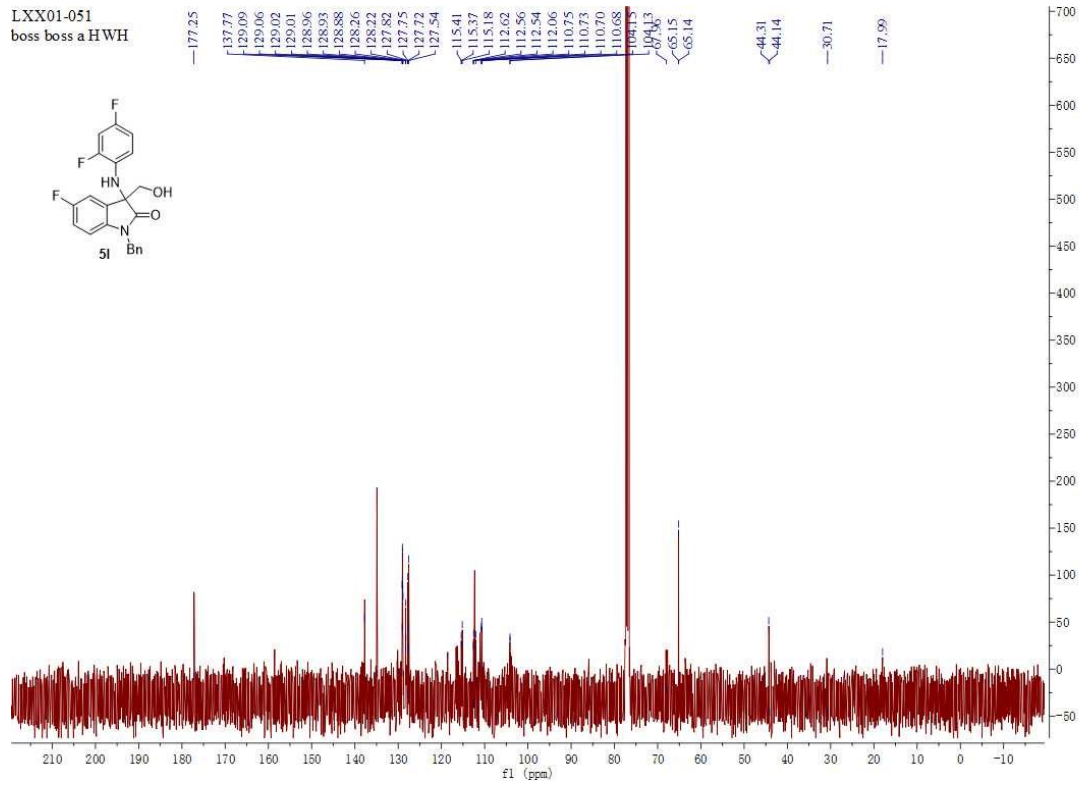

5l Sample Report:

Sample 27 Vial 1:14 ID File LXX01-051 Date 06-Jan-2016 Time 11:24:34 Description

3: UV Detector: 254

2.103  
Range: 2.109

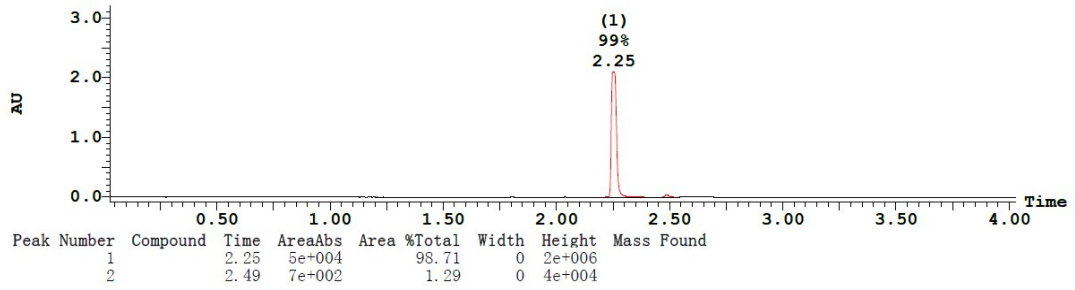

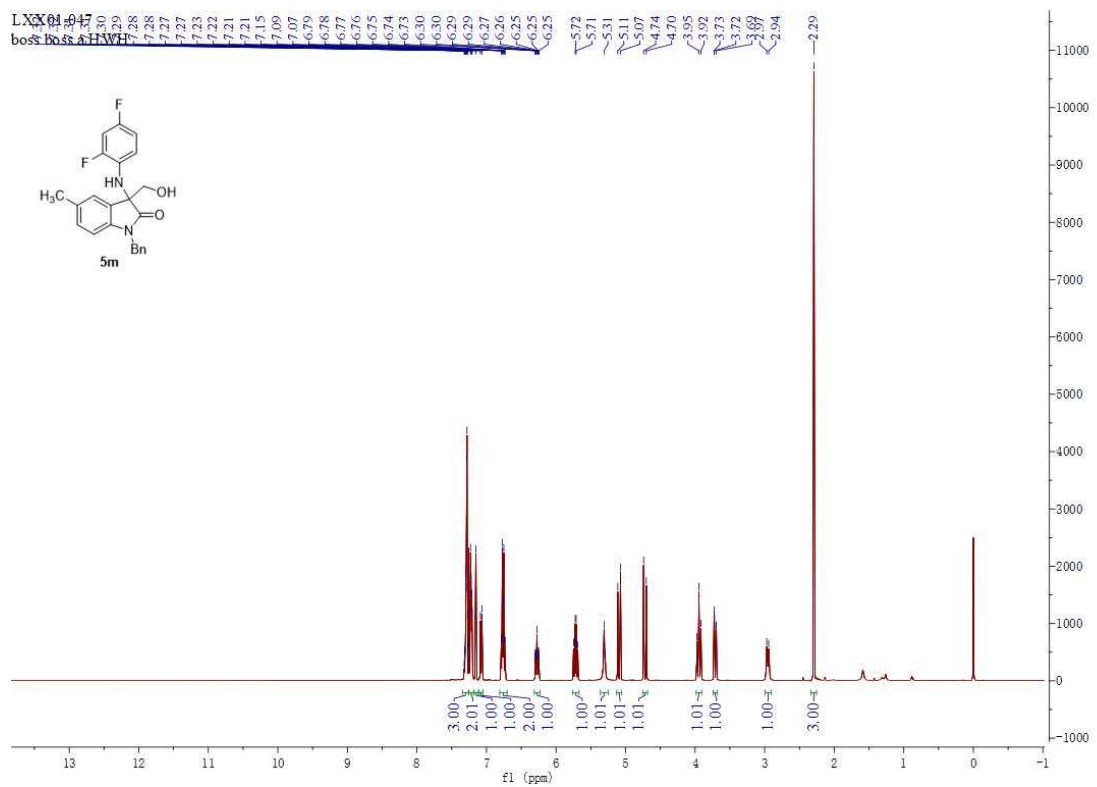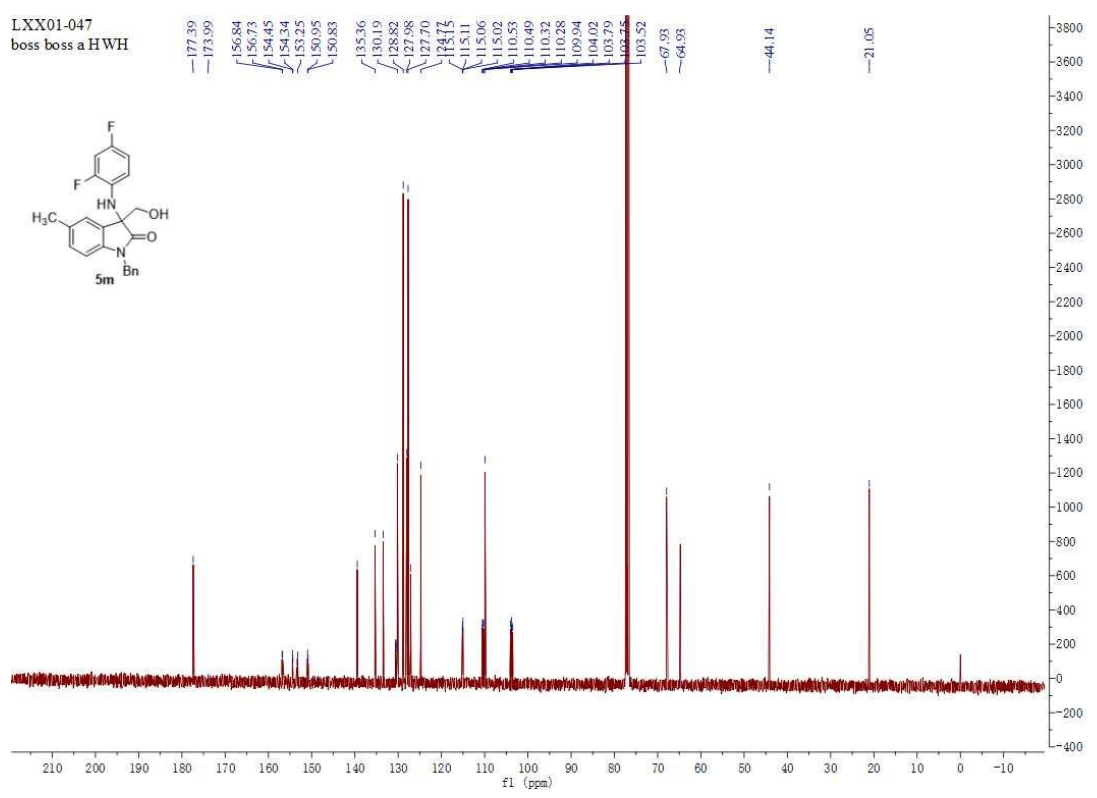

### 5m Sample Report:

Sample 26 Vial 1:12 ID File LXX01-047 Date 06-Jan-2016 Time 11:10:34 Description

3: UV Detector: 254

2.052  
Range: 2.058

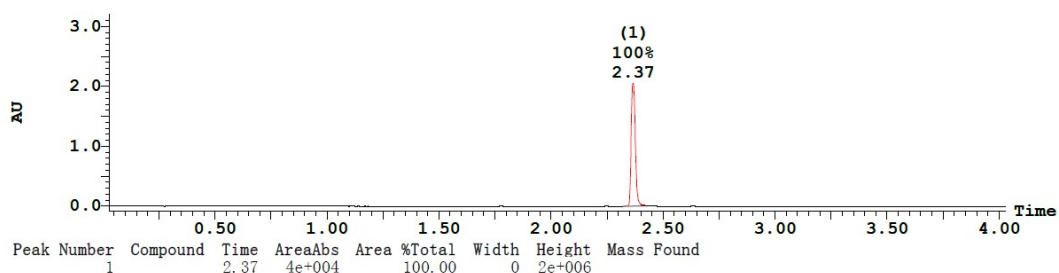

### Western blot

To study the underlying apoptotic mechanism, SJS-1 cells were treated with compound **5m** at different concentration (0  $\mu$ M, 10  $\mu$ M, 20  $\mu$ M or 40  $\mu$ M) for 48 h. Then the cells were collected for western blotting analysis. The proteins of whole cell lysates were prepared in IP and western cell lysis buffer (Beyotime, China), and quantified by the bicinchoninic acid (BCA) method. Immunoblotting analysis of proteins in cell lysates was performed according to the antibody manufacturer's recommendations. Primary antibodies used were as follows: anti-Bcl-2(2872#), anti-Bax (2772#) and anti-tubulin (15115#) were purchased from Cell Signaling Technology (Danvers, MA, USA). The results showed that 5m-treatment induced an increase of anti-apoptosis protein Bcl-2 expression. And the ratio of Bax/Bcl-2 was elevated in 5a-treated cells in a dose-dependent manner, which suggested that 5a might induced cell apoptosis in SJS-1 through an intrinsic mitochondrial pathway. Further study on the investigation of its underlying mechanism is in progress.

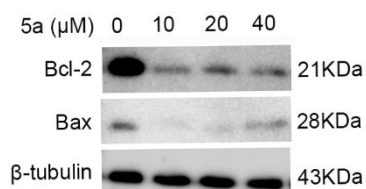

Supplement: c6ra27536b1.pdf [file c6ra27536b1.pdf]
